# Supplementary material for: Near-infrared photochromic behavior in a donor–acceptor type diarylethene modulated by the cyanide anion
Source: Royal Society of Chemistry journal article supplement (doi:10.1039/c3an36388k), 2013-01-01
Supplement: c3an36388k.pdf [file c3an36388k.pdf]

## Electronic Supplementary Information (ESI)

### Modulation of the Near-Infrared Photochromic Behavior in a Donor-Acceptor Diarylethene by a Cyanide Anion

Jiayu Jin, Junji Zhang, Lei Zou and He Tian\*

Key Laboratory for Advanced Materials and Institute of Fine Chemicals, East China  
University of Science & Technology, Shanghai 200237, China

E-mail: [tianhe@ecust.edu.cn](mailto:tianhe@ecust.edu.cn) (He Tian);

Fax: +86 21-64252288; Tel: +86-21-64252756

#### Contents:

**Scheme S1** Synthetic routine of compounds **1a** and **1b**.

**Fig. S1** UV-vis spectral changes of the **1b** ( $2.0 \times 10^{-5}$  M) upon 365nm light irradiation in CH<sub>2</sub>Cl<sub>2</sub> at 25 °C (0-90m).

**Fig. S2** Changes in graphs of color upon alternating irradiation with UV/vis light in CH<sub>2</sub>Cl<sub>2</sub> for **1a** and **2a**.

**Fig. S3** Changes in graphs of color upon alternating irradiation with UV/vis light in CH<sub>2</sub>Cl<sub>2</sub> for **1b** and **2b**.

**Fig. S4** Crystal structure of **1b**.

**Fig. S5** UV-vis spectral changes of **1a** ( $2.0 \times 10^{-5}$  M) upon the addition of 1.375 equiv. of cyanide anion in CH<sub>3</sub>CN at 25°C.

**Fig. S6** UV-vis spectral changes of **1b** ( $2.0 \times 10^{-5}$  M) upon the addition of 6.0 equiv. of cyanide anion in CH<sub>3</sub>CN at 25°C.

**Fig. S7** Fluorescence spectral changes of **1b** ( $2.0 \times 10^{-5}$  M) upon the addition of 6.0 equiv. of cyanide anion in CH<sub>3</sub>CN at 25°C,  $\lambda_{\text{ex}}=370$  nm.

**Fig. S8** Changes in graphs of fluorescence upon addition CN<sup>-</sup> in CH<sub>3</sub>CN for **1a** and

**1b** when excited 365 nm.

**Fig. S9** Time-dependent changes in the fluorescence intensity at  $\lambda = 458$  nm observed from the reaction between 1.0 equiv. **1a** ( $2.0 \times 10^{-5}$  M) and different equiv. cyanide anion. (a) 1.375 equiv. cyanide anion. (b) 0.125 equiv. cyanide anion.

**Fig. S10** Time-dependent changes in the fluorescence intensity at  $\lambda = 458$  nm observed from the reaction between 1.0 equiv. **1b** ( $2.0 \times 10^{-5}$  M) and different equiv. cyanide anion. (a) 6.0 equiv. cyanide anion. (b) 1.0 equiv. cyanide anion.

**Fig. S11** (a) Plot of fluorescence intensity changes of **1a** ( $2.0 \times 10^{-5}$  M) against varied concentrations of  $\text{CN}^-$  from  $0.25 \times 10^{-5}$  M to  $2.5 \times 10^{-5}$  M ( $\lambda_{\text{ex}} = 370$  nm, slit: 5 nm/5 nm, PMT Volts: 500.).  $R = 0.993$ ,  $k = 2.6 \times 10^7$  au/M, (b) Plot of fluorescence intensity changes of **1b** ( $2.0 \times 10^{-5}$  M) against varied concentrations of  $\text{CN}^-$  from  $2.0 \times 10^{-5}$  M to  $1.1 \times 10^{-4}$  M ( $\lambda_{\text{ex}} = 370$  nm, slit: 5 nm/5 nm, PMT Volts: 550.).  $R = 0.992$ ,  $k = 8.3 \times 10^6$  au/M

**Fig. S12** Relative fluorescence intensities of the free **1b** ( $2.0 \times 10^{-5}$  M) upon the addition of 6.0 equiv. of various anions in  $\text{CH}_3\text{CN}$ . Each spectrum was obtained after addition of various analytes at  $25^\circ\text{C}$  for 2 min.

**Fig. S13**  $^1\text{H}$  NMR spectral changes seen upon the addition of cyanide anion (as its tetrabutylammonium salts) to **1b** in  $\text{CDCl}_3$  at  $25^\circ\text{C}$ .

**Fig. S14** UV-vis spectral changes of the **1b**- $\text{CN}^-$  ( $2.0 \times 10^{-5}$  M) upon 254 nm light irradiation in  $\text{CH}_3\text{CN}$  (0-15 m) at  $25^\circ\text{C}$ .

**Fig. S15** Fluorescence spectral changes of the **1b**- $\text{CN}^-$  ( $2.0 \times 10^{-5}$  M) upon 254 nm light irradiation in  $\text{CH}_3\text{CN}$  (0-15 m) at  $25^\circ\text{C}$ .

**Fig. S16** Changes in graphs of color upon addition  $\text{CN}^-$  in  $\text{CH}_3\text{CN}$  for **2a**.

**Fig. S17** UV-vis spectral changes of **2b** ( $2.0 \times 10^{-5}$  M) upon the addition of 3.0 equiv. of cyanide anion in  $\text{CH}_3\text{CN}$  at  $25^\circ\text{C}$ .

**Fig. S18** Changes in graphs of color upon addition  $\text{CN}^-$  in  $\text{CH}_3\text{CN}$  for **2b**.

**Fig. S19** Image patterns of word "CN" with a PMMA on a quartz plate: (a) Fluorescence images of **1b**/PMMA in the presence of cyanide. (b) Color images of **2b**/PMMA in the presence of cyanide.

**Fig. 20-22**  $^1\text{H}$ ,  $^{13}\text{C}$  NMR spectrum and Mass spectrum of **4a**.

**Fig. 23-25**  $^1\text{H}$ ,  $^{13}\text{C}$  NMR spectrum and Mass spectrum of **5a**.

**Fig. 26-28**  $^1\text{H}$ ,  $^{13}\text{C}$  NMR spectrum and Mass spectrum of **1a**.

**Fig. 29-31**  $^1\text{H}$ ,  $^{13}\text{C}$  NMR spectrum and Mass spectrum of **4b**.

**Fig. 32-34**  $^1\text{H}$ ,  $^{13}\text{C}$  NMR spectrum and Mass spectrum of **5b**.

**Fig. 35-37**  $^1\text{H}$ ,  $^{13}\text{C}$  NMR spectrum and Mass spectrum of **1b**.

## Experimental section

### Materials and instrumentations

The synthesis of 1-(5-chloro-2-methyl-3-thienyl)-2-(5-formyl-2-methyl-3-thienyl)cyclopentene and phosphonium salt were based on the literature method<sup>1-2</sup>. All purchased chemicals and reagents were of high commercially available grade. Solvents were purified by standard procedures.

<sup>1</sup>H and <sup>13</sup>C NMR spectra were recorded on a Bruker AM-400 spectrometer in CDCl<sub>3</sub> solutions using tetramethylsilane as the internal standard (chemical shifts in parts per million). High resolution mass spectra (HRMS) were recorded on a Waters LCT Premier XE spectrometer using standard conditions (ESI, 70eV). All UV-Vis absorption and fluorescence emission spectrum were recorded with a Varian Cray 500 and a Varian Cary Eclipse, respectively.

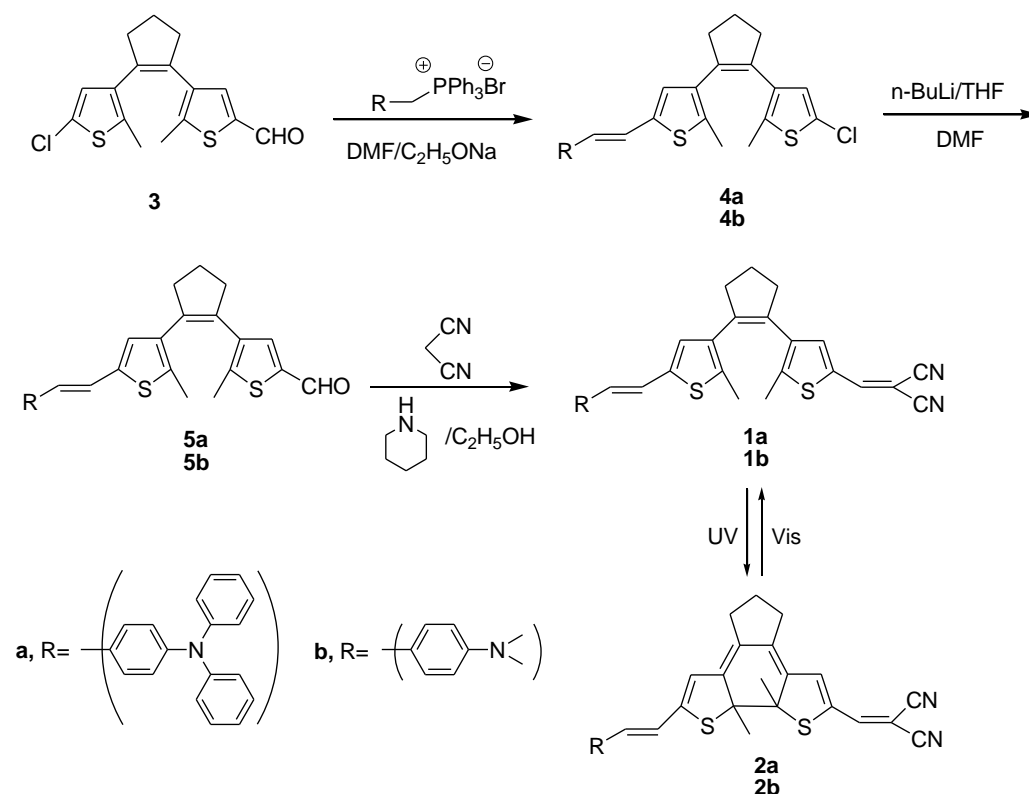

**Scheme S1** Synthetic routine of compounds **1a** and **1b**.

Synthesis of 1-(5-chloro-2-methyl-3-thienyl)-2-(5-(triphenylamine-1-yl)vinyl)-2-methyl-3-thienyl)cyclopentene (**4a**)

To a stirring solution of **3** (1.4g, 4.5mmol) and phosphonium salt (3.0g, 5mmol) in DMF (25 mL), was added C<sub>2</sub>H<sub>5</sub>ONa (0.34g, 5mmol). The mixture was then refluxed for overnight. After cooling, water (50 mL) was added to the reaction mixture. The resulting mixture was extracted by dichloromethane (3 times) and the organic solvent

was removed in vacuum and the residue was purified by column chromatography (silica gel, petroleum ether) to give the compound **4a** (0.92g, 36.2%) as a yellow solid;  $^1\text{H}$  NMR (400 MHz,  $\text{CDCl}_3$ )  $\delta$  7.31 – 7.23 (m, 5H), 7.09 (d, 4H,  $J = 7.6$  Hz), 7.00–7.04 (m, 5H), 6.97 (d, 1H,  $J = 16.0$  Hz), 6.69 (d, 1H,  $J = 16.0$  Hz), 6.68 (s, 1H), 6.61 (s, 1H), 2.79 – 2.69 (m, 4H), 2.07 – 1.99 (m, 2H), 1.96 (s, 3H), 1.87 (s, 3H);  $^{13}\text{C}$  NMR (100 MHz,  $\text{CDCl}_3$ )  $\delta$  147.56, 147.11, 139.11, 135.90, 135.15, 135.12, 133.80, 133.70, 133.28, 131.34, 129.30, 127.01, 126.88, 126.82, 126.77, 125.00, 124.47, 123.64, 123.01, 120.43, 38.42 (s, 5H), 22.91 (s, 3H), 14.62 (s, 2H), 14.23 (s, 3H); HRMS (ESI) calcd for  $\text{C}_{35}\text{H}_{31}\text{ClNS}_2$  ( $\text{M}+\text{H}$ ) 564.1586, found 564.1585.

Synthesis of 1-(5-formyl-2-methyl-3-thienyl)-2-(5-(triphenylamine-1-yl)vinyl-2-methyl-3-thienyl)cyclopentene (**5a**)

Compound **4a** (0.90g, 1.60 mmol) was dissolved in anhydrous THF (15 mL) and *n*-butyl lithium (1.5 mL of 1.6 M solution in hexane) was added dropwise under nitrogen at 0 °C using a syringe. The mixture was stirred for 30 min at 0 °C and then the reaction mixture was quenched with anhydrous dimethylformamide (0.62 mL). The mixture was stirred for an addition hour at room temperature, before it was poured into  $\text{H}_2\text{O}$ . The mixture was extracted with ether. The organic layer was dried over  $\text{MgSO}_4$ , filtrated, and concentrated. The residue was purified by column chromatography (silica gel,  $\text{CH}_2\text{Cl}_2$ / petroleum ether 1:1) to give the compound **5a** (0.29g, 32.6%) as a yellow solid;  $^1\text{H}$  NMR (400 MHz,  $\text{CDCl}_3$ )  $\delta$  9.74 (s, 1H), 7.46 (s, 1H), 7.29–7.23 (m, 5H), 7.10 (d, 5H,  $J = 7.7$  Hz), 7.02 (t, 4H,  $J = 8.0$  Hz), 6.95 (d, 1H,  $J = 15.9$  Hz), 6.69 (d, 1H,  $J = 16.0$  Hz), 6.67 (s, 1H), 2.81 (t, 4H,  $J = 7.5$  Hz), 2.12 – 2.04 (m, 2H), 2.08 (s, 3H), 1.92 (s, 3H);  $^{13}\text{C}$  NMR (100 MHz,  $\text{CDCl}_3$ )  $\delta$  182.62, 147.52, 147.20, 146.65, 139.80, 139.54, 138.11, 137.77, 136.37, 135.54, 133.74, 133.05, 131.14, 129.30, 127.08, 127.03, 126.53, 124.49, 123.56, 123.05, 120.17, 38.46, 38.33, 23.02, 15.51, 14.55; HRMS (ESI) calcd for  $\text{C}_{36}\text{H}_{32}\text{NOS}_2$  ( $\text{M}+\text{H}$ ) 558.1925, found 558.1923.

Synthesis of 1-(5-dicyanoethenyl-2-methyl-3-thienyl) -2-(5-(triphenylamine-1-yl) vinyl- 2-methyl-3-thienyl)cyclopentene (**1a**)

A mixture of malonitrile (24mg, 0.36mmol), **5a** (100mg, 0.18mmol) and a catalytic amount of piperidine (2 drop of a stock solution of 1 drop of amine in 2 mL of absolute ethanol) in absolute ethanol (7 mL) was heated to reflux. After 17 h, the solution was cooled to room temperature and solvent was removed in vacuo. The residue was purified by column chromatography (silica gel,  $\text{CH}_2\text{Cl}_2$ / petroleum ether 1:1) to give the compound **1a** (75mg, 68.9%) as a purple solid;  $^1\text{H}$  NMR (400 MHz,  $\text{CDCl}_3$ )  $\delta$  7.68 (s, 1H), 7.44 (s, 1H), 7.32–7.26 (m, 5H), 7.15–7.11 (m, 5H), 7.07–7.03 (m, 4H), 6.97 (d, 1H,  $J = 16.0$  Hz), 6.72 (d, 1H,  $J = 16.1$  Hz), 6.66 (s, 1H), 2.82 (dd, 4H,  $J = 11.3, 5.9$  Hz), 2.16 (s, 3H), 2.13 – 2.07 (m, 2H), 1.95 (s, 3H);  $^{13}\text{C}$  NMR (100 MHz,  $\text{CDCl}_3$ )  $\delta$  150.76, 149.56, 147.51, 140.35, 139.88, 138.72, 137.57, 135.31, 133.74, 132.11, 131.71, 131.03, 129.33, 127.36, 127.09, 126.33, 124.54, 123.52, 123.12, 120.02, 114.32, 113.44, 38.50, 38.25, 22.94, 15.61, 14.59; HRMS (ESI) calcd for  $\text{C}_{39}\text{H}_{32}\text{N}_3\text{S}_2$  ( $\text{M}+\text{H}$ ) 606.2038, found 606.2032.

Synthesis of 1-(5-chloro-2-methyl-3-thienyl)-2-(5-(dimethylphenylamine-1-yl)vinyl-2-methyl-3-thienyl)cyclopentene (**4b**)

To a stirring solution of **3** (0.85g, 2.64mmol) and phosphonium salt (1.38g, 2.90mmol) in DMF (20 mL), was added C<sub>2</sub>H<sub>5</sub>ONa (0.20g, 2.90mmol). The mixture was then refluxed for overnight. After cooling, water (40 mL) was added to the reaction mixture. The resulting mixture was extracted by dichloromethane (3 times) and the organic solvent was removed in vacuum and the residue was purified by column chromatography (silica gel, petroleum ether) to give the compound **4b** (0.48g, 41.4%) as a yellow solid; <sup>1</sup>H NMR (400 MHz, CDCl<sub>3</sub>) δ 7.32 (d, 2H, *J* = 8.7 Hz), 6.89 (d, 1H, *J* = 16.0 Hz), 6.70 (d, 2H, *J* = 2.3 Hz), 6.67 (d, 1H, *J* = 4.8 Hz), 6.64 (s, 1H), 6.61 (s, 1H), 2.97 (s, 6H), 2.78 – 2.70 (m, 4H), 2.05 – 2.00 (m, 2H), 1.94 (s, 3H), 1.87 (s, 3H); <sup>13</sup>C NMR (100 MHz, CDCl<sub>3</sub>) δ 149.93, 139.76, 135.74, 135.31, 135.20, 133.45, 133.28, 132.88, 127.59, 127.28, 126.86, 125.83, 125.56, 124.92, 117.90, 112.50, 40.51, 38.41, 22.91, 14.58, 14.27; HRMS (ESI) calcd for C<sub>25</sub>H<sub>27</sub>ClNS<sub>2</sub> (M+H) 440.1273, found 440.1273.

Synthesis of 1-(5-formyl-2-methyl-3-thienyl)-2-(5-(dimethylphenylamine-1-yl)vinyl-2-methyl-3-thienyl)cyclopentene (**5b**)

Compound **4b** (0.43g, 1.0 mmol) was dissolved in anhydrous THF (9 mL) and *n*-butyl lithium (0.93 mL of 1.6 M solution in hexane) was added dropwise under nitrogen at 0 °C using a syringe. The mixture was stirred for 30 min at 0 °C and then the reaction mixture was quenched with anhydrous dimethylformamide (0.36 mL). The mixture was stirred for an additional hour at room temperature, before it was poured into H<sub>2</sub>O. The mixture was extracted with ether. The organic layer was dried over MgSO<sub>4</sub>, filtrated, and concentrated. The residue was purified by column chromatography (silica gel, CH<sub>2</sub>Cl<sub>2</sub>/ petroleum ether 1:1) to give the compound **5b** (0.15g, 34.7%) as a yellow solid; <sup>1</sup>H NMR (400 MHz, CDCl<sub>3</sub>) δ 9.74 (s, 1H), 7.47 (s, 1H), 7.32 (d, 2H, *J* = 8.8 Hz), 6.88 (d, 1H, *J* = 16.0 Hz), 6.70 (d, 2H, *J* = 3.9 Hz), 6.67 (d, 1H, *J* = 3.2 Hz), 6.63 (s, 1H), 2.97 (s, 6H), 2.80 (t, 4H, *J* = 7.5 Hz), 2.11 – 2.04 (m, 2H), 2.08 (s, 3H), 1.89 (s, 3H); <sup>13</sup>C NMR (100 MHz, CDCl<sub>3</sub>) δ 182.66, 150.00, 146.69, 140.19, 139.75, 138.21, 137.86, 136.52, 135.39, 132.81, 129.82, 127.91, 127.31, 125.48, 125.35, 117.63, 112.44, 40.46, 38.34, 23.09, 15.54, 14.51; HRMS (ESI) calcd for C<sub>26</sub>H<sub>28</sub>NOS<sub>2</sub> (M+H) 434.1612, found 434.1613

Synthesis of 1-(5-dicyanoethenyl-2-methyl-3-thienyl)-2-(5-(dimethylphenylamine-1-yl)vinyl-2-methyl-3-thienyl)cyclopentene (**1b**)

A mixture of malonitrile (27mg, 0.40mmol), **5b** (87mg, 0.2mmol) and a catalytic amount of piperidine (2 drop of a stock solution of 1 drop of amine in 2 mL of absolute ethanol) in absolute ethanol (7 mL) was heated to reflux. After 17 h, the solution was cooled to room temperature and solvent was removed in vacuo. The residue was purified by column chromatography (silica gel, CH<sub>2</sub>Cl<sub>2</sub>/ petroleum ether 1:1) to give the compound **1b** (70mg, 72.9%) as a purple solid; <sup>1</sup>H NMR (400 MHz, CDCl<sub>3</sub>) δ 7.66 (s, 1H), 7.42 (s, 1H), 7.32 (d, 2H, *J* = 8.7 Hz), 6.87 (d, 1H, *J* = 16.0

Hz), 6.70 (d, 2H,  $J = 6.4$  Hz), 6.67 (s, 1H), 6.60 (s, 1H), 2.98 (s, 6H), 2.80 (dd, 4H,  $J = 12.7, 5.4$  Hz), 2.14 (s, 3H), 2.11 – 2.06 (m, 2H), 1.90 (s, 3H);  $^{13}\text{C}$  NMR (100 MHz,  $\text{CDCl}_3$ )  $\delta$  150.75, 150.07, 149.59, 140.52, 140.37, 138.80, 137.72, 135.12, 132.80, 131.85, 131.66, 128.18, 127.33, 125.23, 117.46, 114.32, 113.43, 112.43, 40.43, 38.50, 38.24, 22.91, 15.59, 14.50; HRMS (ESI) calcd for  $\text{C}_{29}\text{H}_{28}\text{N}_3\text{S}_2$  (M+H) 482.1725, found 482.1727.

### Preparation of the PMMA films

To prepare the PMMA thin film sensors, **1a**, **1b**, **2a** or **2b** (2mg) was dissolved in dichloromethane and added PMMA (50mg) in the solution standing until the PMMA was resolved. The solution was poured onto a clean glass surface and evaporated to dryness, and a homogeneous, nonfluorescence polymer sensor film was obtained. This thin film was covered with a shadow mask including the CN<sup>-</sup> fingerprint. A solution containing tetrabutylammonium cyanide in dichloromethane (1 mM) was sprayed onto the film, and the solvent was evaporated in air.

### Crystallography

Single crystals of **1a** and **1b** suitable for X-ray analyses were obtained by slow evaporation of their corresponding solutions at room temperature.

Crystal data for **1a**:  $\text{C}_{39}\text{H}_{31}\text{N}_3\text{S}_2$ ,  $M_w=605.79$  g·mol<sup>-1</sup>,  $0.32 \times 0.22 \times 0.15$  mm<sup>3</sup>, *Monoclinic*,  $P2(1)/c$ ,  $a = 19.681(2)$ ,  $b = 8.3397(9)$ ,  $c = 21.489(2)$  Å,  $\beta = 110.841(2)^\circ$ ,  $V=3296.3(6)$  Å<sup>3</sup>,  $F(000)=1272$ ,  $\rho_{\text{calcd}}=1.221$  Mg/m<sup>3</sup>,  $\mu(\text{MoK}\alpha)=0.193$  mm<sup>-1</sup>,  $T=293(2)$  K, 19525 data were measured on a Bruker SMART Apex diffractometer, of which 6488 were unique ( $R_{\text{int}}=0.0318$ ); 399 parameters were refined against  $F_o^2$  (all data), final  $wR_2=0.1393$ ,  $S=1.026$ ,  $R_1(I>2\sigma(I))=0.0542$ , largest final difference peak/hole = +0.314/-0.154 eÅ<sup>-3</sup>. Structure solution by direct methods and full-matrix least-squares refinement against  $F^2$  (all data) using SHELXTL.

Crystal data for **1b**:  $\text{C}_{29}\text{H}_{27}\text{N}_3\text{S}_2$ ,  $M_w=481.66$  g·mol<sup>-1</sup>,  $0.30 \times 0.20 \times 0.05$  mm<sup>3</sup>, *Monoclinic*,  $P2(1)/c$ ,  $a = 24.443(4)$ ,  $b = 8.3483(15)$ ,  $c = 12.521(2)$  Å,  $\beta = 99.817(3)^\circ$ ,  $V=2517.6(8)$  Å<sup>3</sup>,  $F(000)=1016$ ,  $\rho_{\text{calcd}}=1.271$  Mg/m<sup>3</sup>,  $\mu(\text{MoK}\alpha)=0.234$  mm<sup>-1</sup>,  $T=133(2)$  K, 15534 data were measured on a Bruker SMART Apex diffractometer, of which 4538 were unique ( $R_{\text{int}}=0.0550$ ); 311 parameters were refined against  $F_o^2$  (all data), final  $wR_2=0.1568$ ,  $S=1.038$ ,  $R_1(I>2\sigma(I))=0.0637$ , largest final difference peak/hole = +1.438/-1.089 eÅ<sup>-3</sup>. Structure solution by direct methods and full-matrix least-squares refinement against  $F^2$  (all data) using SHELXTL.

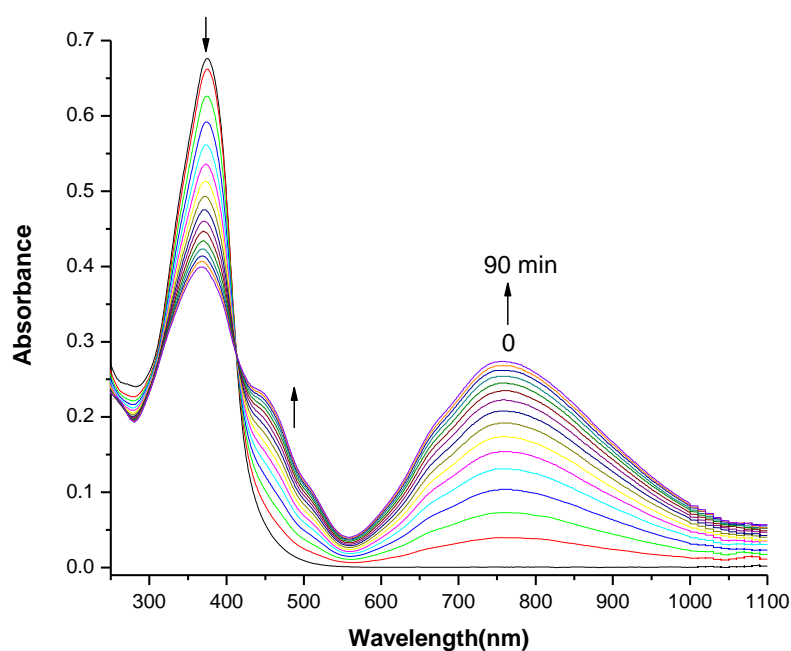

**Fig. S1** UV-vis spectral changes of the **1b** ( $2.0 \times 10^{-5}$  M) upon 365nm light irradiation in  $\text{CH}_2\text{Cl}_2$  at 25 °C (0-90 min).

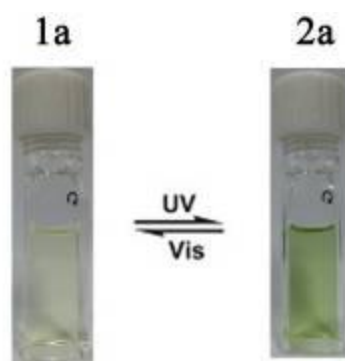

**Fig. S2** Changes in graphs of color upon alternating irradiation with UV/vis light in  $\text{CH}_2\text{Cl}_2$  for **1a** and **2a**.

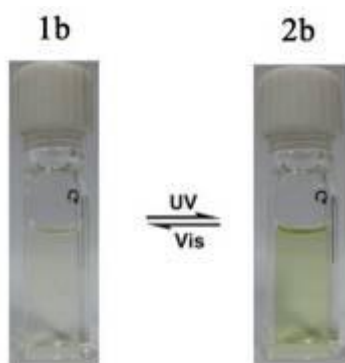

**Fig. S3** Changes in graphs of color upon alternating irradiation with UV/vis light in  $\text{CH}_2\text{Cl}_2$  for **1b** and **2b**.

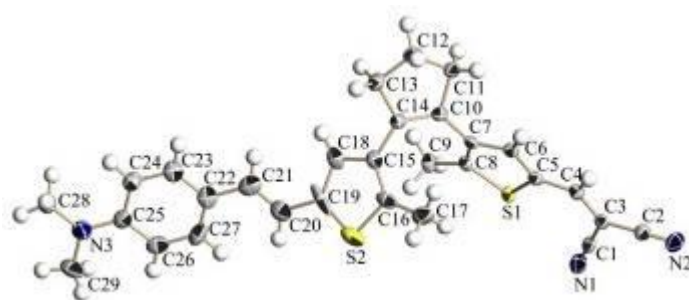

**Fig. S4** Crystal structure of **1b**.

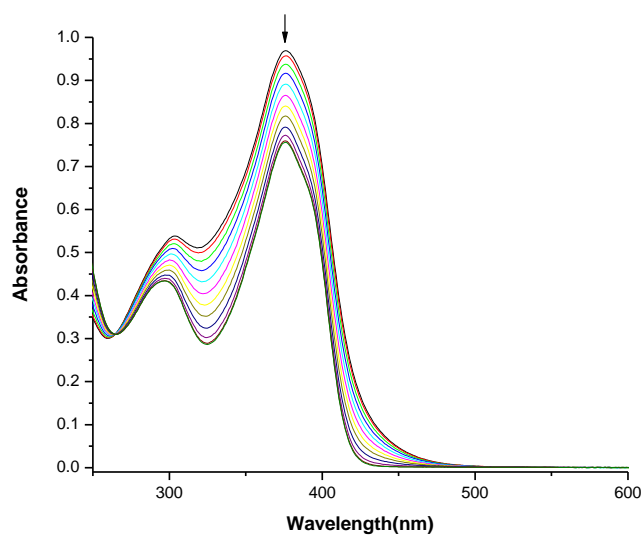

**Fig. S5** UV-vis spectral changes of **1a** ( $2.0 \times 10^{-5}$  M) upon the addition of 1.375 equiv. of cyanide anion in  $\text{CH}_3\text{CN}$  at  $25^\circ\text{C}$ .

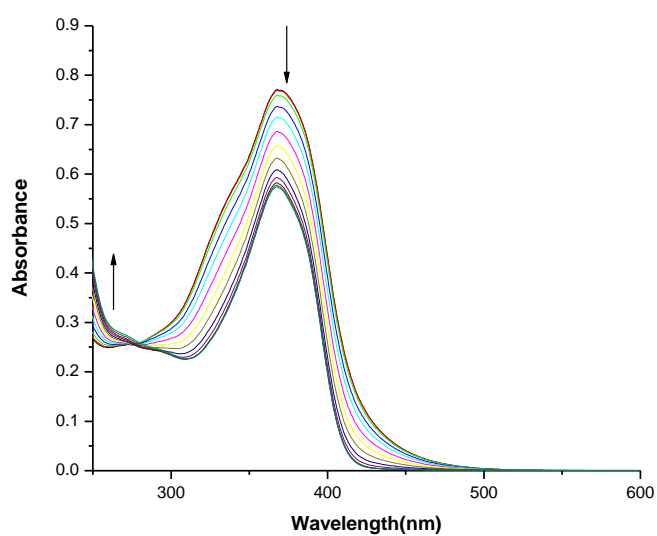

**Fig. S6** UV-vis spectral changes of **1b** ( $2.0 \times 10^{-5}$  M) upon the addition of 6.0 equiv. of cyanide anion in  $\text{CH}_3\text{CN}$  at  $25^\circ\text{C}$ .

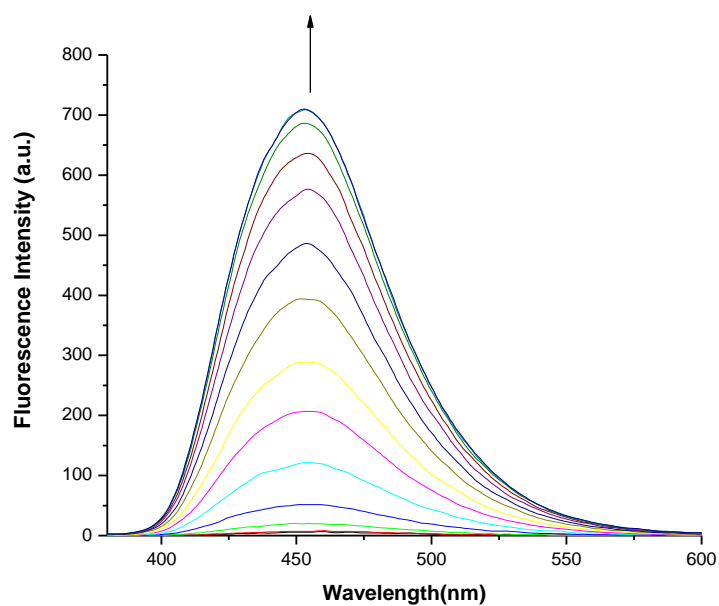

**Fig. S7** Fluorescence spectral changes of **1b** ( $2.0 \times 10^{-5}$  M) upon the addition of 6.0 equiv. of cyanide anion in CH<sub>3</sub>CN at 25 °C,  $\lambda_{\text{ex}}$ =370 nm.

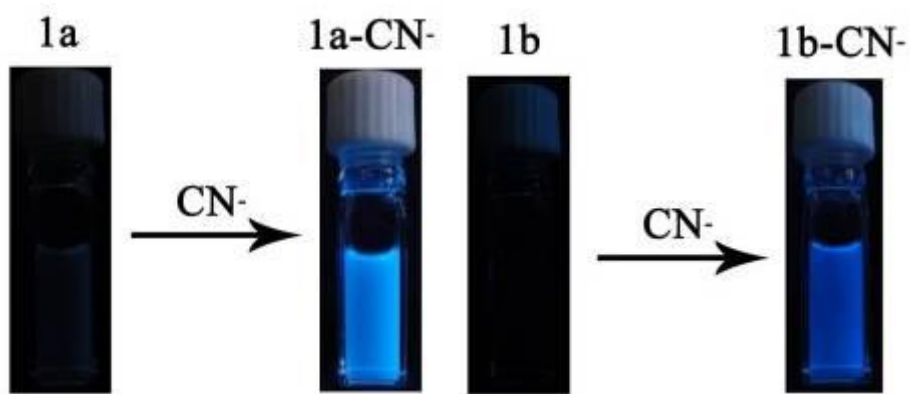

**Fig. S8** Changes in graphs of fluorescence upon addition 1.5 equiv. and 6.0equiv. of CN<sup>-</sup> in CH<sub>3</sub>CN for **1a** and **1b** when excited 365 nm.

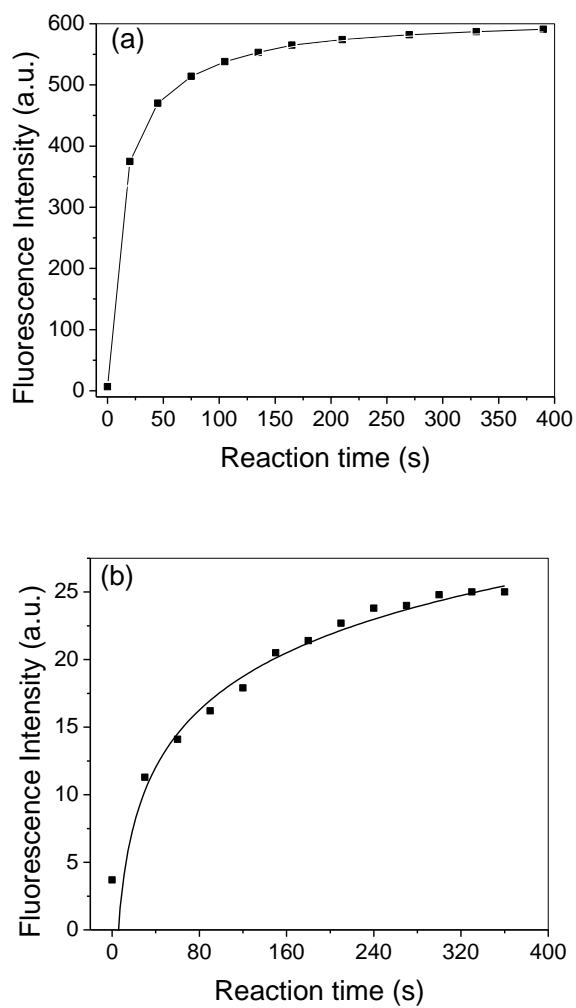

**Fig. S9** Time-dependent changes in the fluorescence intensity at  $\lambda = 458$  nm observed from the reaction between 1.0 equiv. **1a** ( $2.0 \times 10^{-5}$  M) and different equiv. cyanide anion. (a) 1.375 equiv. cyanide anion. (b) 0.125 equiv. cyanide anion.

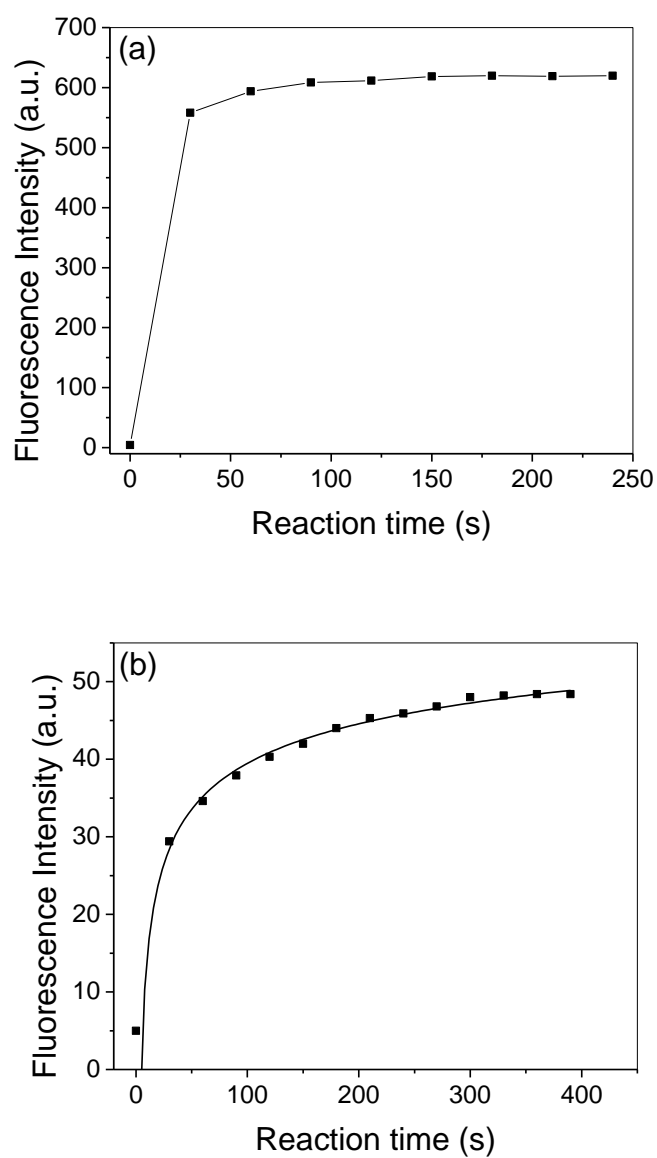

**Fig. S10** Time-dependent changes in the fluorescence intensity at  $\lambda = 458$  nm observed from the reaction between 1.0 equiv. **1b** ( $2.0 \times 10^{-5}$  M) and different equiv. cyanide anion. (a) 6.0 equiv. cyanide anion. (b) 1.0 equiv. cyanide anion.

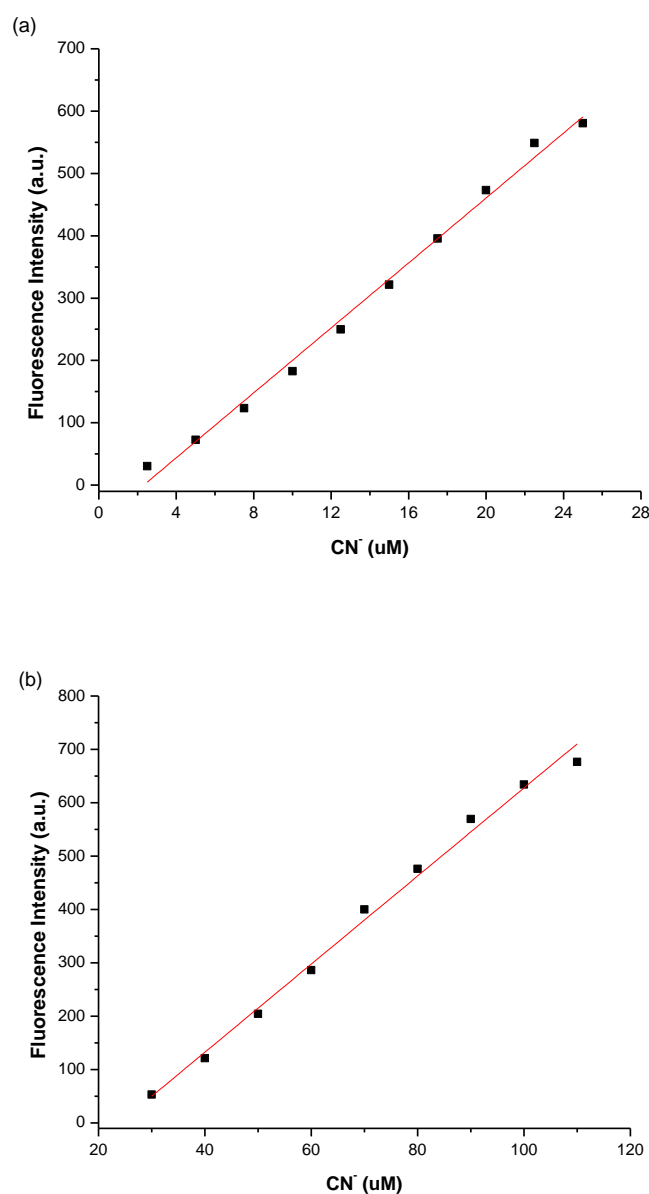

**Fig. S11** (a) Plot of fluorescence intensity changes of **1a** ( $2.0 \times 10^{-5} \text{ M}$ ) against varied concentrations of CN<sup>-</sup> from  $0.25 \times 10^{-5} \text{ M}$  to  $2.5 \times 10^{-5} \text{ M}$  ( $\lambda_{\text{ex}}=370 \text{ nm}$ , slit: 5nm/5nm, PMT Volts: 500.).  $R=0.993$ ,  $k=2.6 \times 10^7 \text{ au/M}$ , (b) Plot of fluorescence intensity changes of **1b** ( $2.0 \times 10^{-5} \text{ M}$ ) against varied concentrations of CN<sup>-</sup> from  $2.0 \times 10^{-5} \text{ M}$  to  $1.1 \times 10^{-4} \text{ M}$  ( $\lambda_{\text{ex}}=370 \text{ nm}$ , slit: 5nm/5nm, PMT Volts: 550.).  $R=0.992$ ,  $k=8.3 \times 10^6 \text{ au/M}$ . The Standard Deviation of **1a** and **1b** were 0.15 and 0.12 by fluorescence responded (7-time of consecutive scanning on the Varian Cray 500 spectrophotometer.). Therefore, the detection limits of **1a** and **1b** were calculated by the formula  $(3\sigma/k)$  and gave the results as  $1.73 \times 10^{-8} \text{ M}$  and  $4.36 \times 10^{-8} \text{ M}$ .

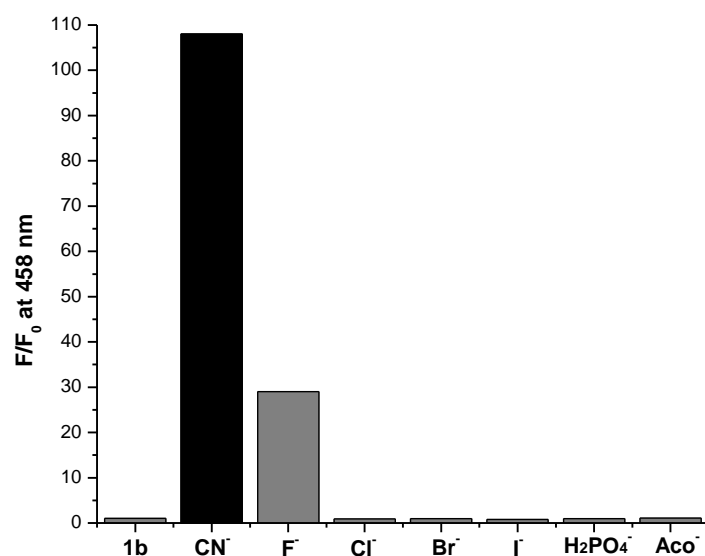

**Fig. S12** Relative fluorescence intensities of the free **1b** ( $2.0 \times 10^{-5}$  M) upon the addition of 6.0 equiv. of various anions in CH<sub>3</sub>CN. Each spectrum was obtained after addition of various analytes at 25 °C for 2 min.

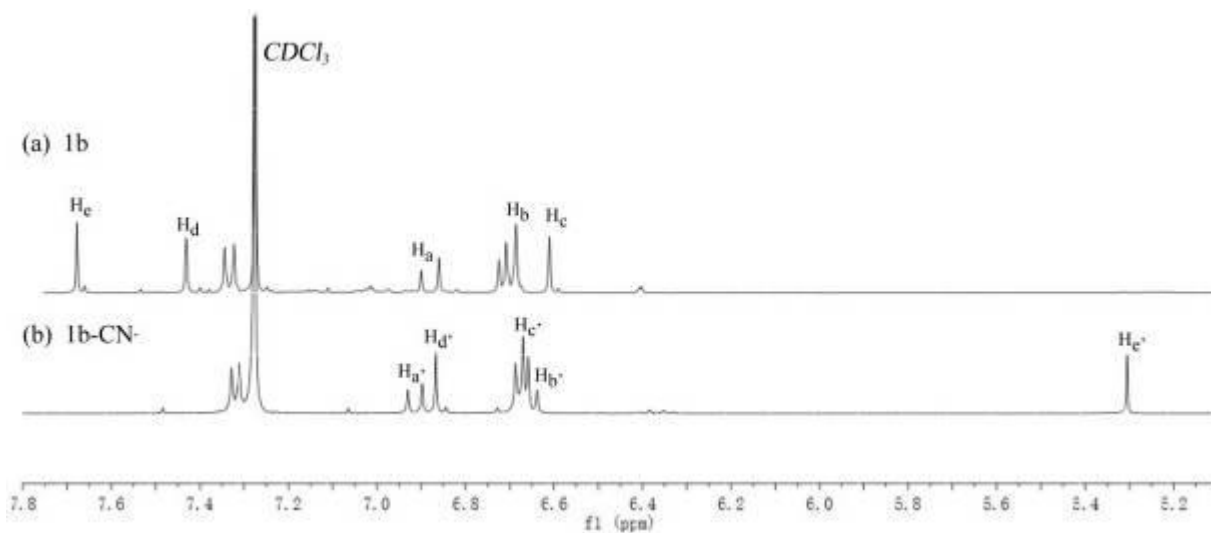

**Fig. S13** <sup>1</sup>H NMR spectral changes seen upon the addition of cyanide anion (as its tetrabutylammonium salts) to **1b** in CDCl<sub>3</sub> at 25 °C.

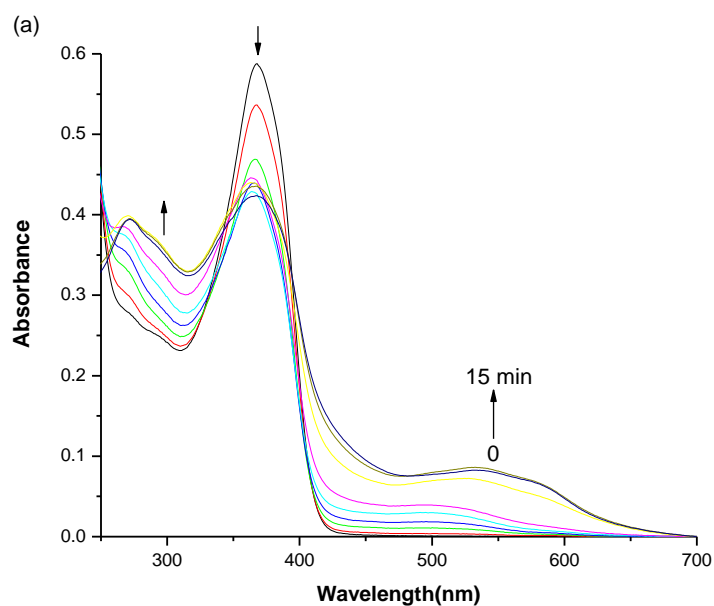

**Fig. S14** UV-vis spectral changes of the **1b-CN<sup>-</sup>** (2.0 × 10<sup>-5</sup> M) upon 254 nm light irradiation in CH<sub>3</sub>CN (0-15min) at 25 °C.

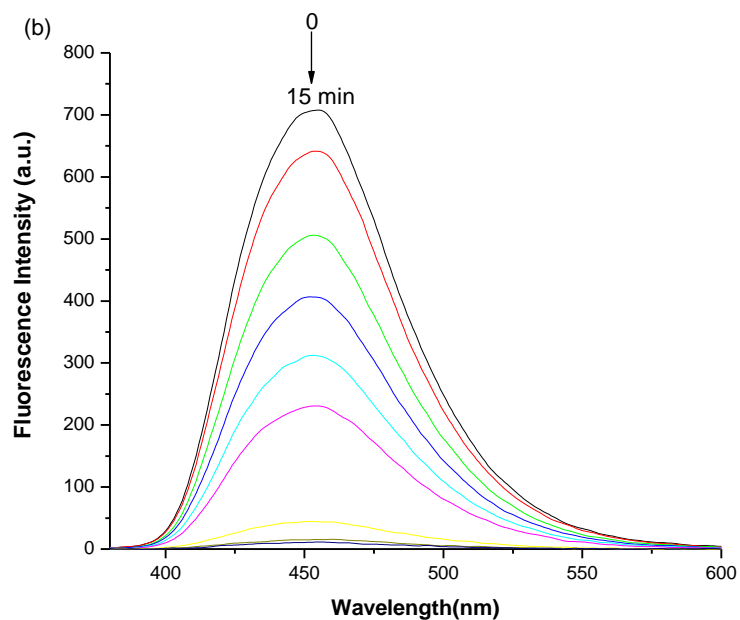

**Fig. S15** Fluorescence spectral changes of the **1b-CN<sup>-</sup>** (2.0 × 10<sup>-5</sup> M) upon 254 nm light irradiation in CH<sub>3</sub>CN (0-15min) at 25 °C.

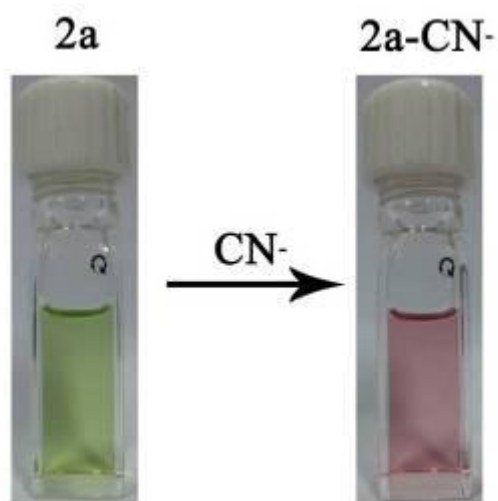

**Fig. S16** Changes in graphs of color upon addition  $\text{CN}^-$  in  $\text{CH}_3\text{CN}$  for **2a**.

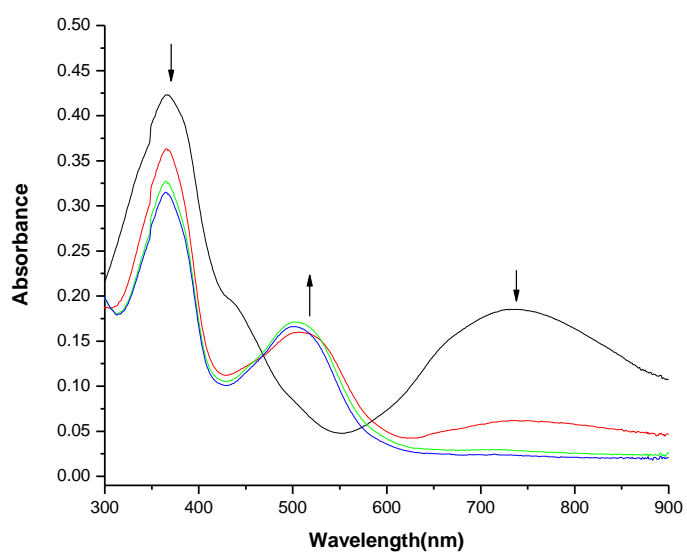

**Fig. S17** UV-vis spectral changes of **2b** ( $2.0 \times 10^{-5} \text{ M}$ ) upon the addition of 3.0 equiv. of cyanide anion in  $\text{CH}_3\text{CN}$  at 25 °C.

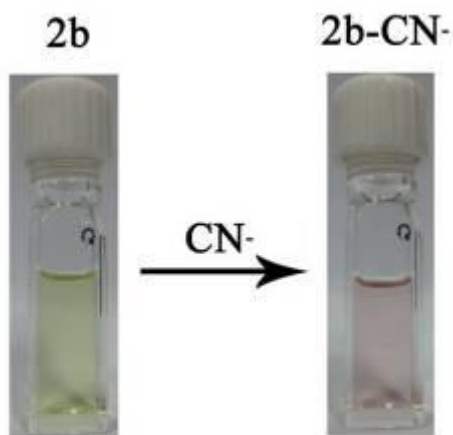

**Fig. S18** Changes in graphs of color upon addition  $\text{CN}^-$  in  $\text{CH}_3\text{CN}$  for **2b**.

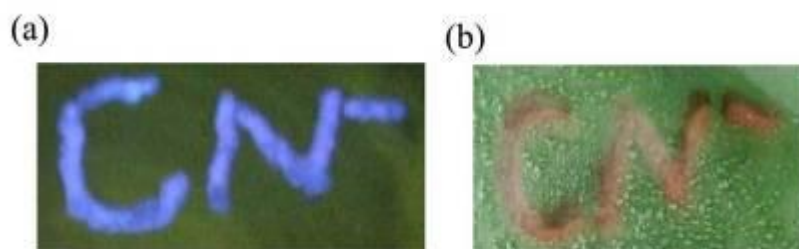

**Fig. S19** Image patterns of word “ $\text{CN}^-$ ” with a PMMA on a quartz plate: (a) Fluorescence images of **1b**/PMMA in the presence of cyanide. (b) Color images of **2b**/PMMA in the presence of cyanide.

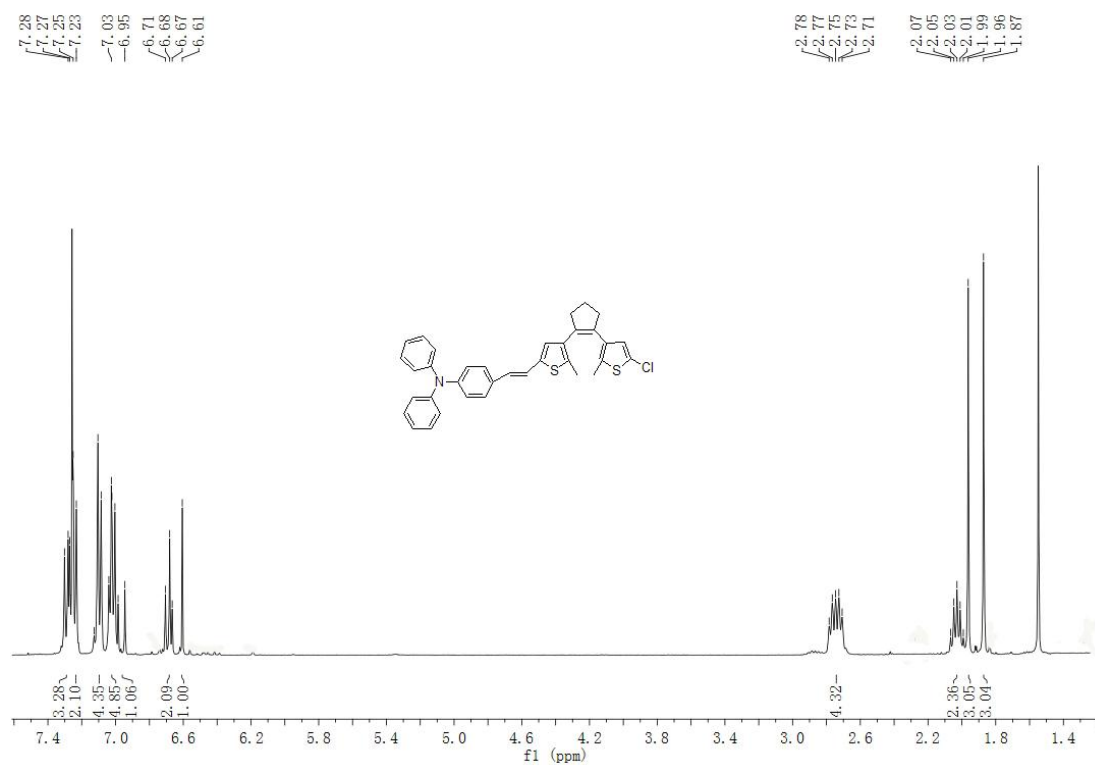

**Fig. S20**  $^1\text{H}$  NMR ( $\text{CDCl}_3$ , 400 MHz) spectrum of **4a**.

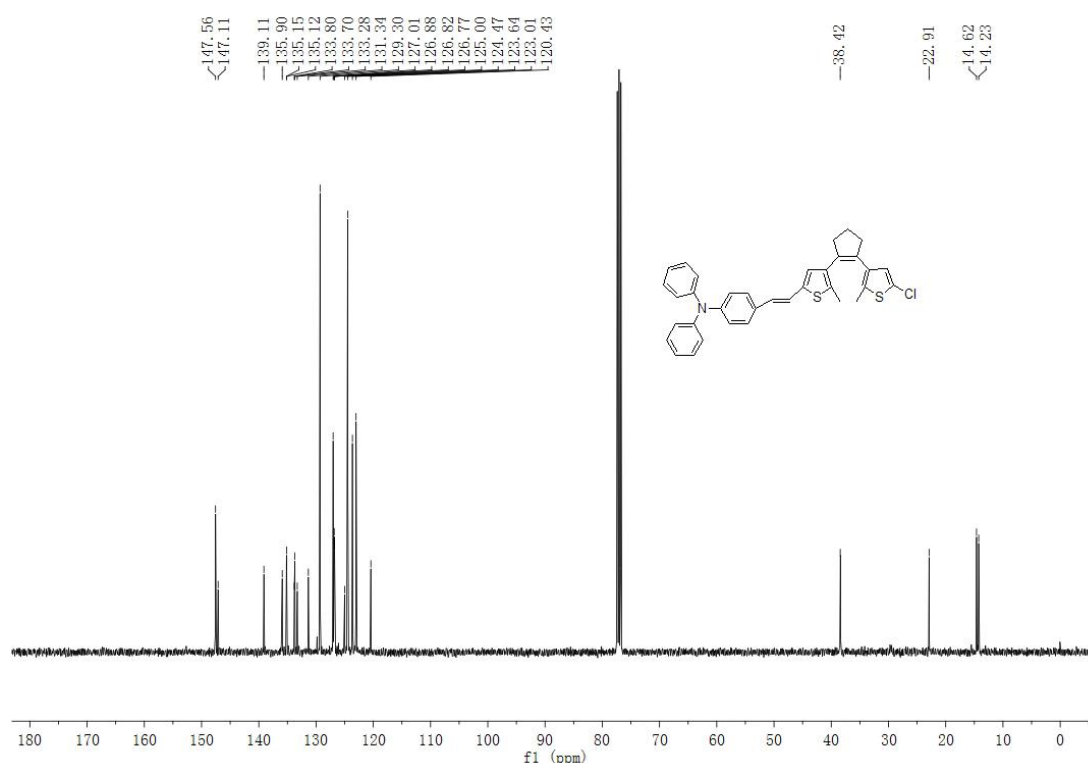

**Fig. S21**  $^{13}\text{C}$  NMR ( $\text{CDCl}_3$ , 100 MHz) spectrum of **4a**.

# Elemental Composition Report

Page 1

## Single Mass Analysis

Tolerance = 50.0 mDa / DBE: min = -1.5, max = 100.0

Element prediction: Off

Number of isotope peaks used for i-FIT = 2

Monoisotopic Mass, Even Electron Ions

207 formula(e) evaluated with 16 results within limits (up to 1 closest results for each mass)

Elements Used:

C: 0-50 H: 0-60 N: 0-4 S: 0-3 Cl: 0-1

H-TIAN

ECUST institute of Fine Chem

13-May-2012

19:24:20

1: TOF MS ES+

3.93e+003

TH-JY-21 41 (1.358) Cm (35:44)

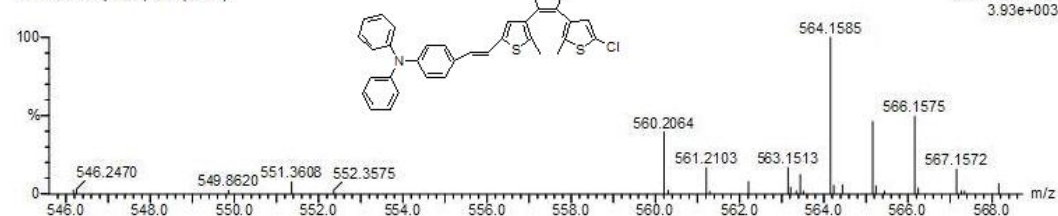

Minimum:

Maximum:

-1.5

50.0

50.0

100.0

Mass

Calc. Mass

mDa

PPM

DBE

i-FIT

i-FIT (Norm)

Formula

564.1585

564.1586

-0.1

-0.2

20.5

52.9

0.0

C35

H31

N

S2

Cl

**Fig. S22** HRMS (ESI) spectrum of compound **4a**.

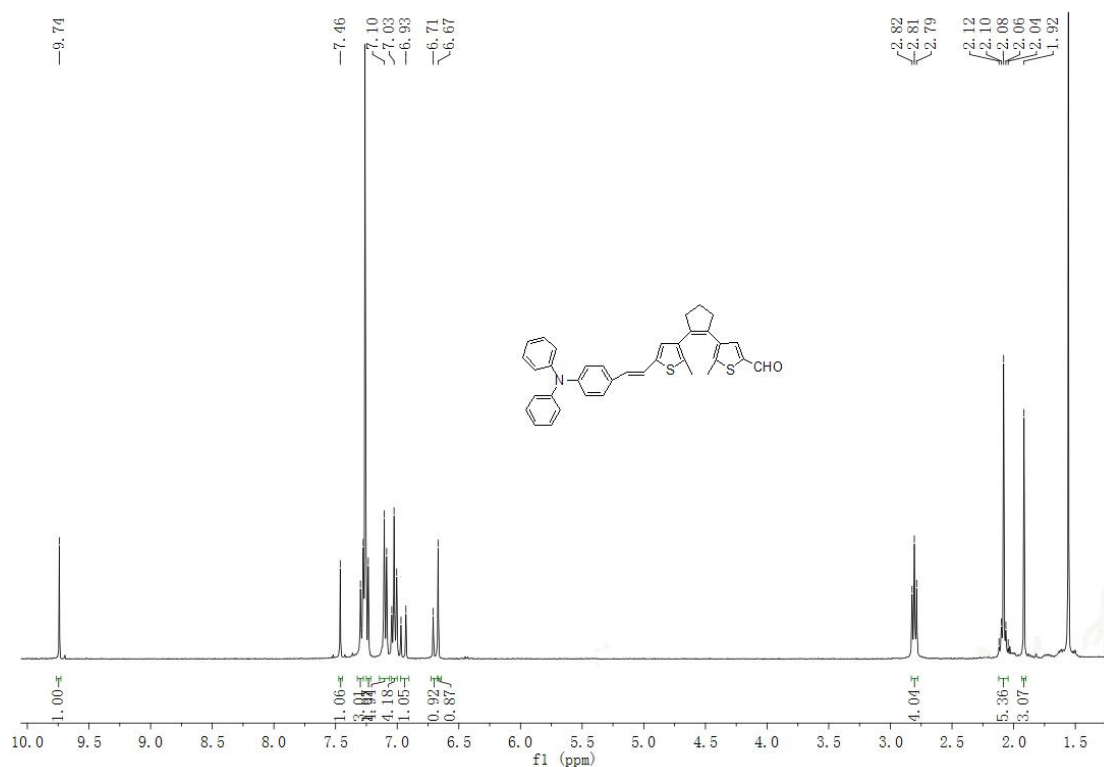

**Fig. S23** <sup>1</sup>H NMR (CDCl<sub>3</sub>, 400 MHz) spectrum of **5a**.

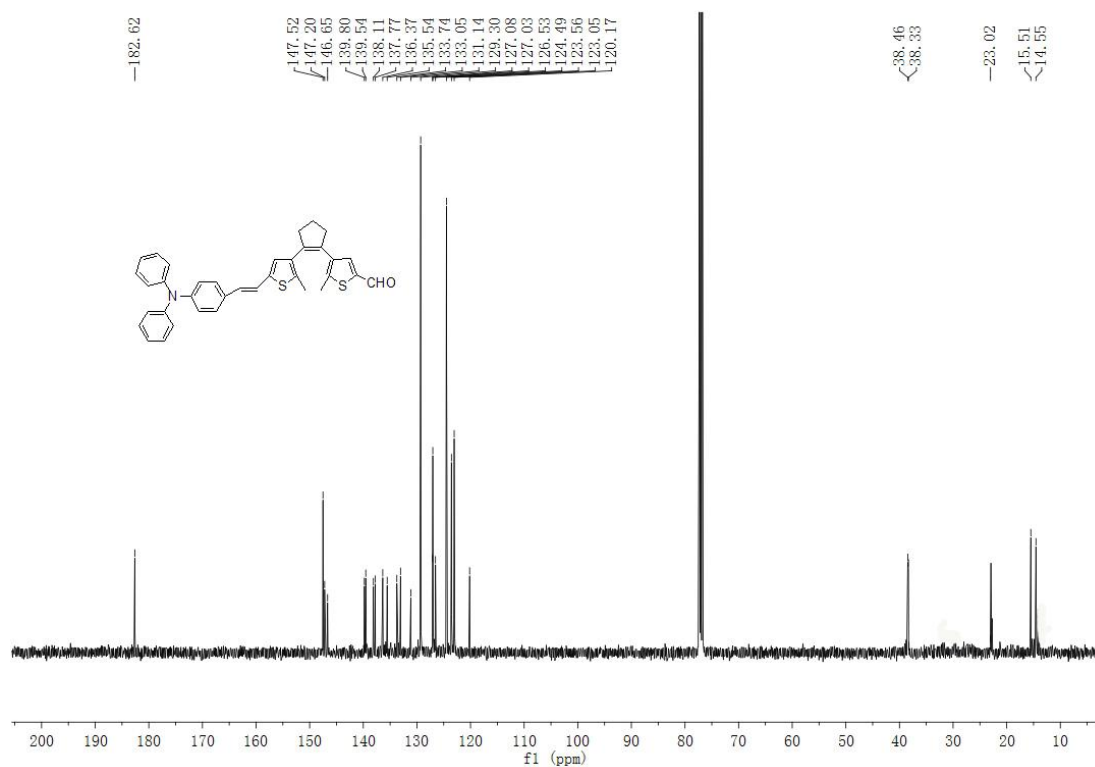

**Fig. S24** <sup>13</sup>C NMR (CDCl<sub>3</sub>, 100 MHz) spectrum of **5a**.

# Elemental Composition Report

Page 1

## Single Mass Analysis

Tolerance = 50.0 mDa / DBE: min = -1.5, max = 100.0

Element prediction: Off

Number of isotope peaks used for i-FIT = 2

Monoisotopic Mass, Even Electron Ions

921 formula(e) evaluated with 74 results within limits (up to 1 closest results for each mass)

Elements Used:

C: 0-50 H: 0-60 N: 0-4 O: 0-8 S: 0-3

H-TIAN

TH-JY-22 17 (0.619) Cm (14.23)

ECUST institute of Fine Chem

13-May-2012

19:35:30

1: TOF MS ES+

2.96e+003

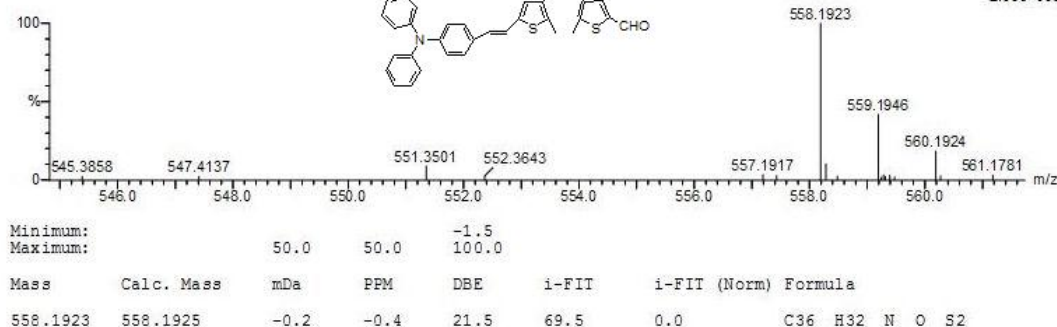

Fig. S25 HRMS (ESI) spectrum of compound 5a.

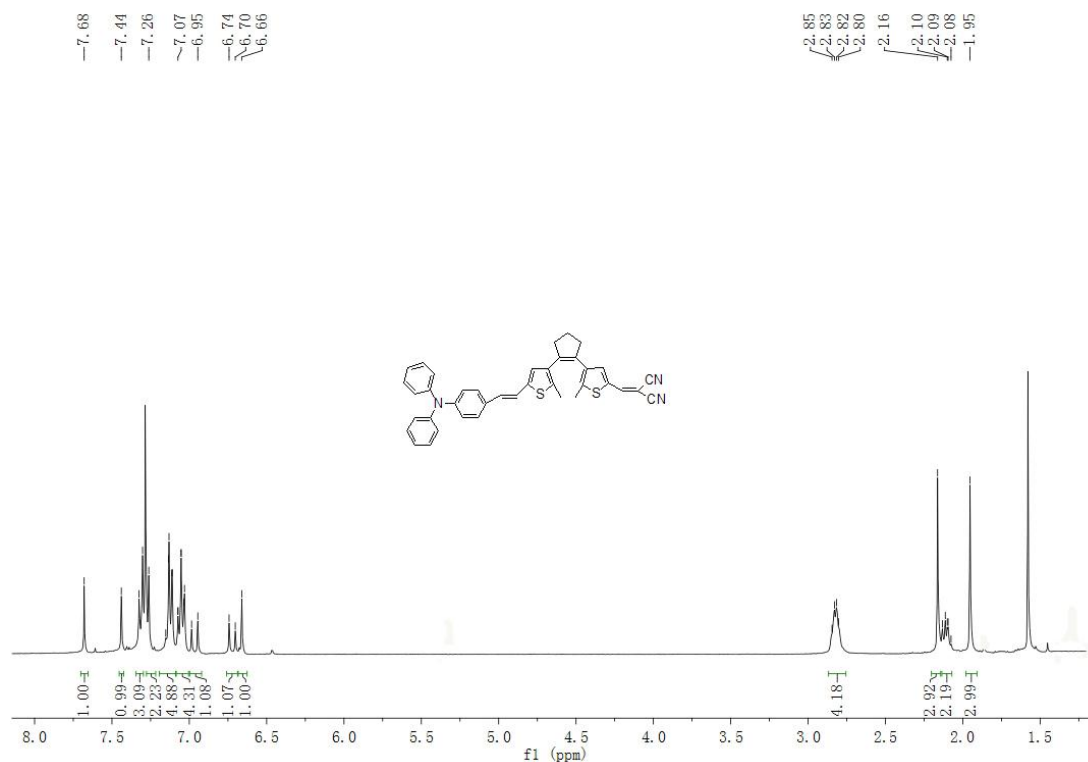

Fig. S26 <sup>1</sup>H NMR (CDCl<sub>3</sub>, 400 MHz) spectrum of 1a.

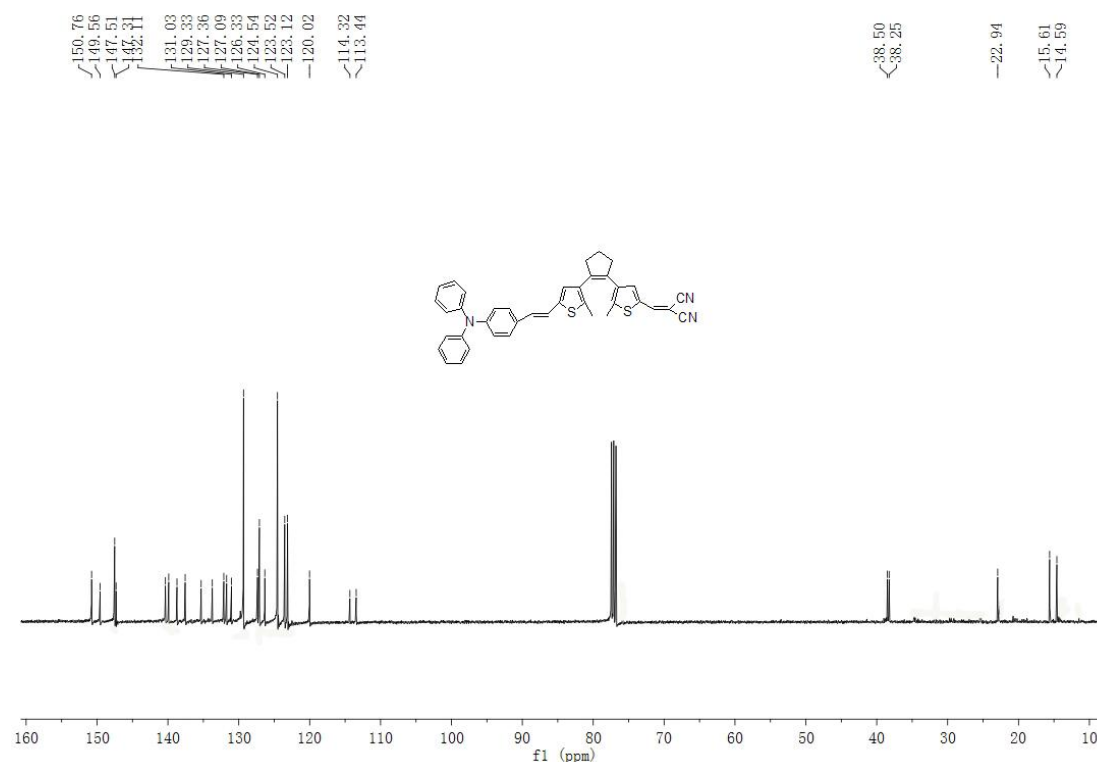

Fig. S27 <sup>13</sup>C NMR (CDCl<sub>3</sub>, 100 MHz) spectrum of 1a.

#### Elemental Composition Report

Page 1

##### Single Mass Analysis

Tolerance = 50.0 mDa / DBE: min = -1.5, max = 100.0

Element prediction: Off

Number of isotope peaks used for i-FIT = 2

Monoisotopic Mass, Even Electron Ions

90 formula(e) evaluated with 9 results within limits (up to 1 closest results for each mass)

Elements Used:

C: 0-40 H: 0-60 N: 0-5 S: 0-4

H-TIAN

ECUST Institute of Fine Chem

19-Apr-2012

18:16:30

1: TOF MS ES+

1.41e+004

TH-JY-12 20 (0.692) Cm (10:24)

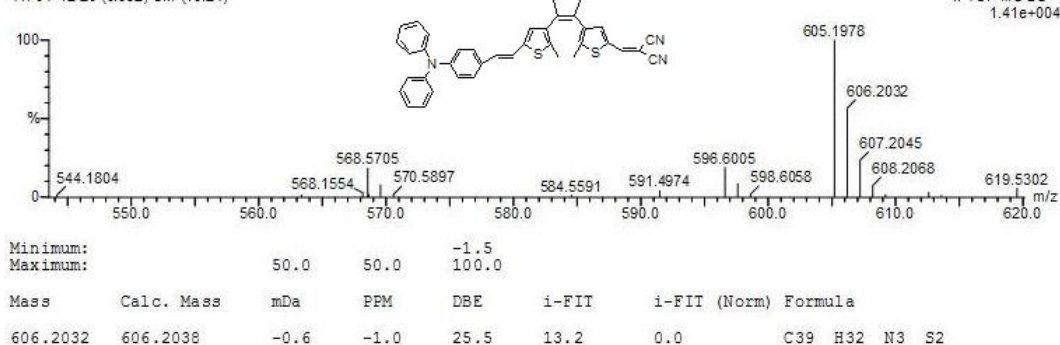

Fig. S28 HRMS (ESI) spectrum of compound 1a.

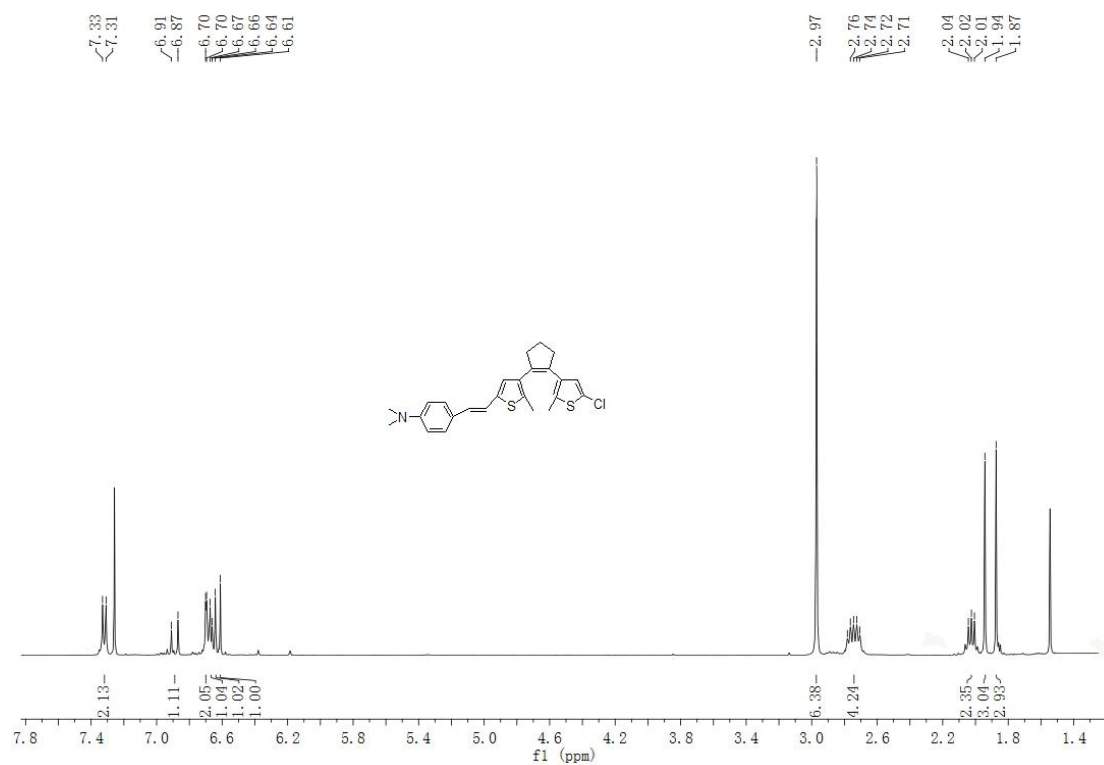

**Fig. S29** <sup>1</sup>H NMR (CDCl<sub>3</sub>, 400 MHz) spectrum of **4b**.

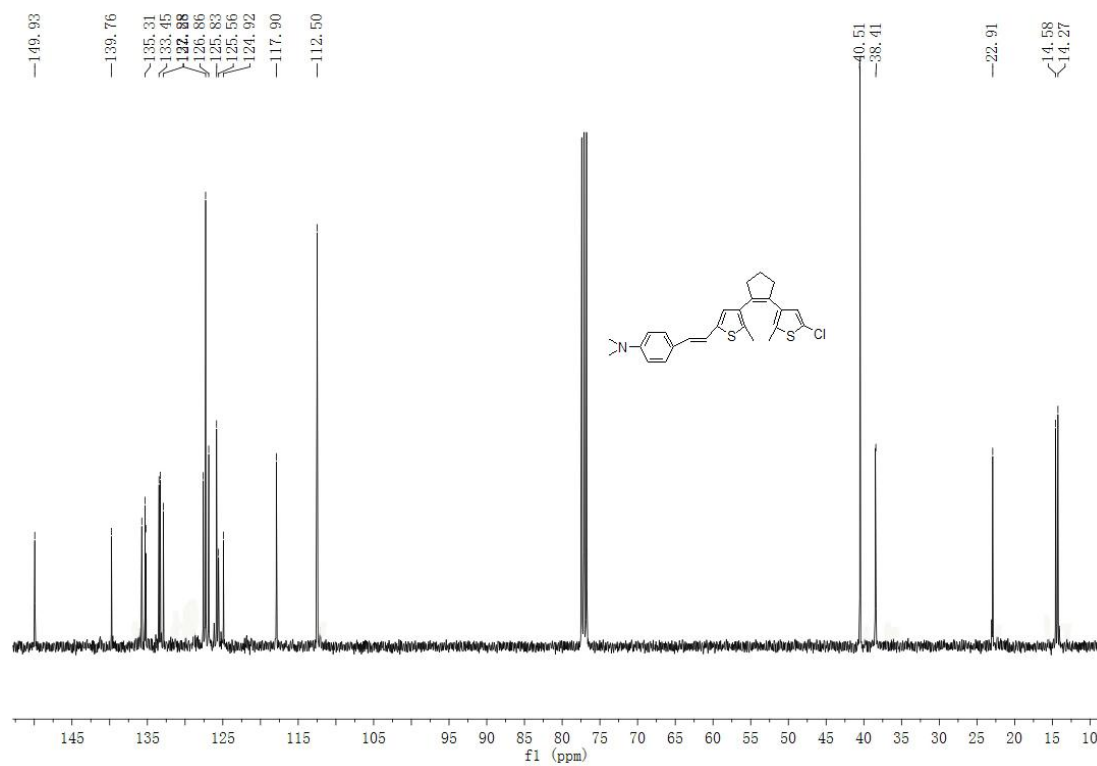

**Fig. S30** <sup>13</sup>C NMR (CDCl<sub>3</sub>, 100 MHz) spectrum of **4b**.

# Elemental Composition Report

Page 1

## Single Mass Analysis

Tolerance = 50.0 mDa / DBE: min = -1.5, max = 100.0

Element prediction: Off

Number of isotope peaks used for i-FIT = 2

Monoisotopic Mass, Even Electron Ions

199 formula(e) evaluated with 16 results within limits (up to 1 closest results for each mass)

Elements Used:

C: 0-50 H: 0-60 N: 0-4 S: 0-3 Cl: 0-1

H-TIAN

ECUST Institute of Fine Chem

TH-JY-11 25 (0.865) Cm (21:31)

13-May-2012

19:31:13

1: TOF MS ES+

1.50e+004

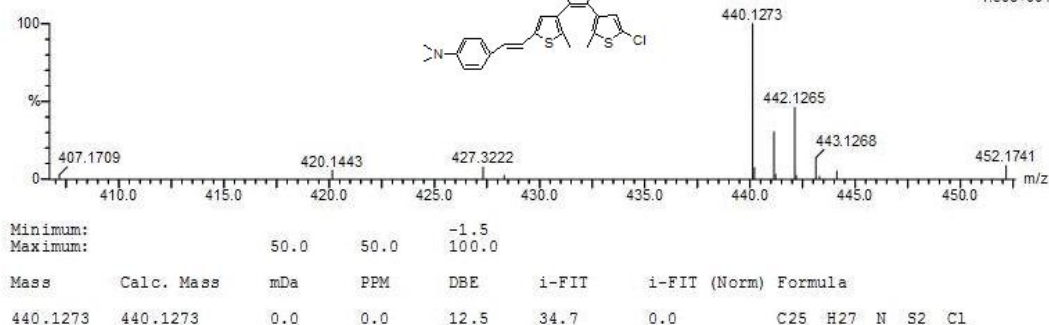

Fig. S31 HRMS (ESI) spectrum of compound 4b.

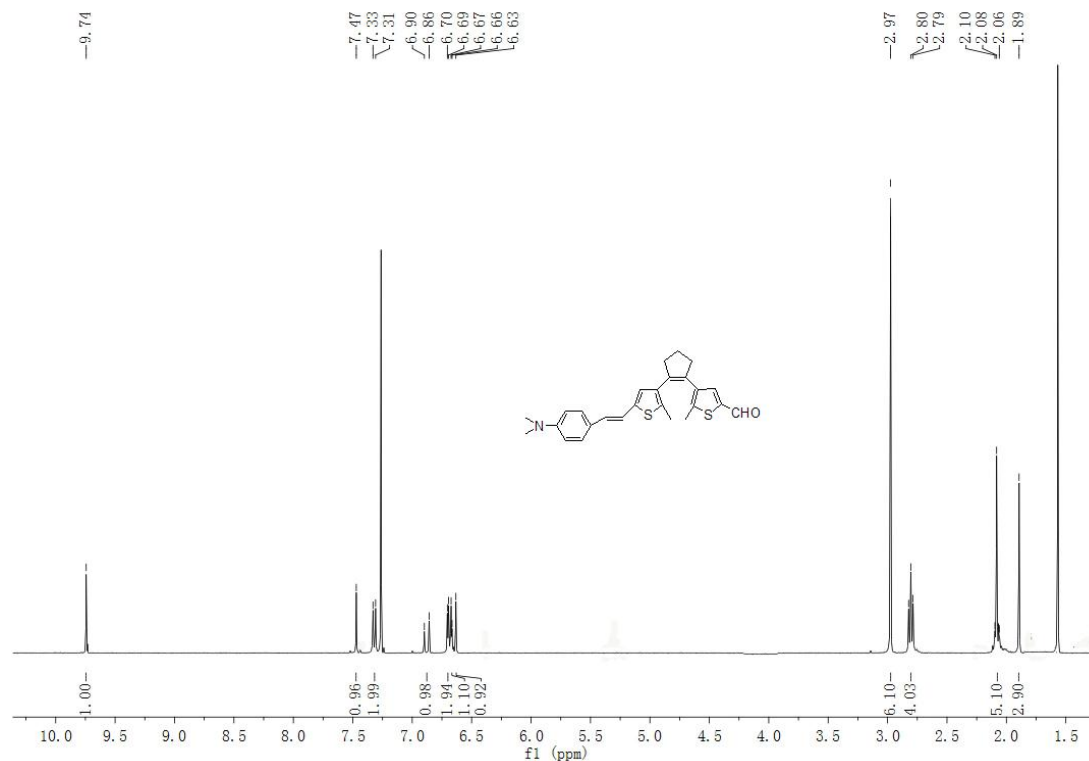

Fig. S32 <sup>1</sup>H NMR (CDCl<sub>3</sub>, 400 MHz) spectrum of 5b.

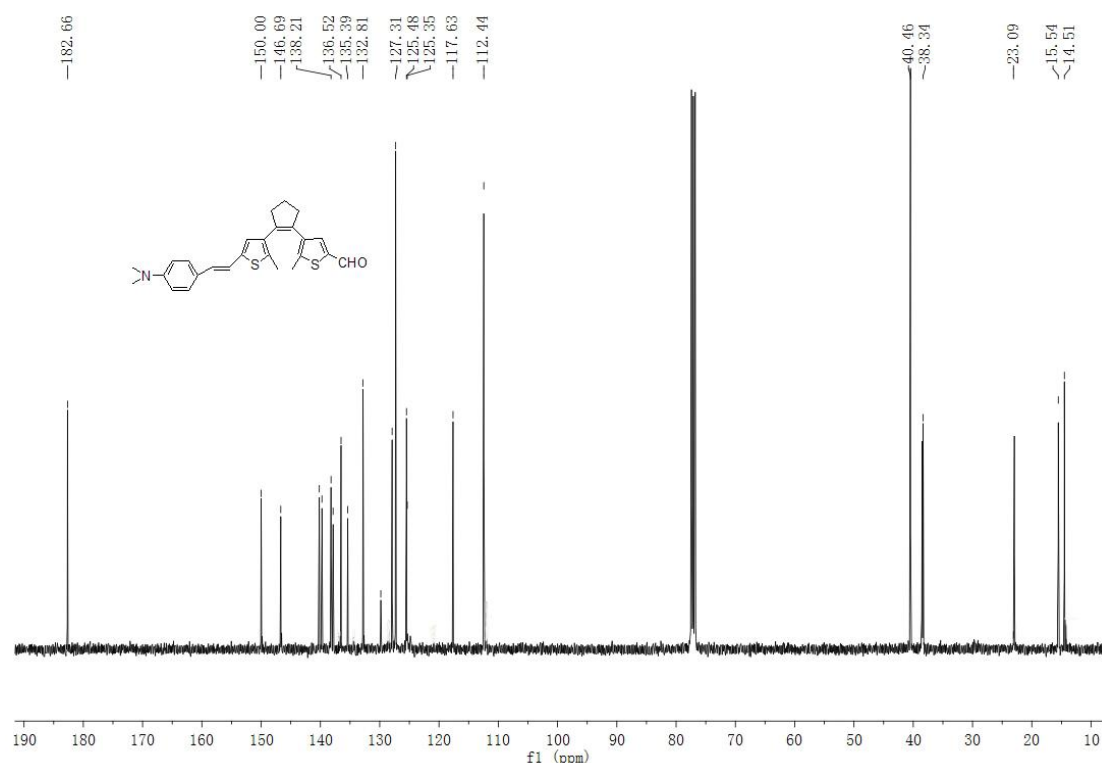

Fig. S33 <sup>13</sup>C NMR (CDCl<sub>3</sub>, 100 MHz) spectrum of 5b.

#### Elemental Composition Report

Page 1

##### Single Mass Analysis

Tolerance = 50.0 mDa / DBE: min = -1.5, max = 100.0

Element prediction: Off

Number of isotope peaks used for i-FIT = 2

Monoisotopic Mass, Even Electron Ions

811 formula(e) evaluated with 71 results within limits (up to 1 closest results for each mass)

Elements Used:

C: 0-50 H: 0-60 N: 0-4 O: 0-8 S: 0-3

H-TIAN

ECUST Institute of Fine Chem

13-May-2012

19:13:50

1: TOF MS ES+

2.04e+004

TH-JY-12 43 (1.404) Cm (38:48)

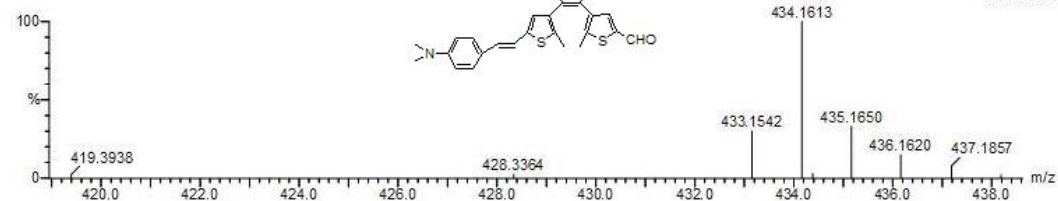

Minimum:

Maximum:

50.0

50.0

-1.5

100.0

Mass

Calc. Mass

mDa

PPM

DBE

i-FIT

i-FIT (Norm)

Formula

434.1613

434.1612

0.1

0.2

13.5

22.9

0.0

C<sub>26</sub> H<sub>28</sub> N O S<sub>2</sub>

Fig. S34 HRMS (ESI) spectrum of compound 5b.

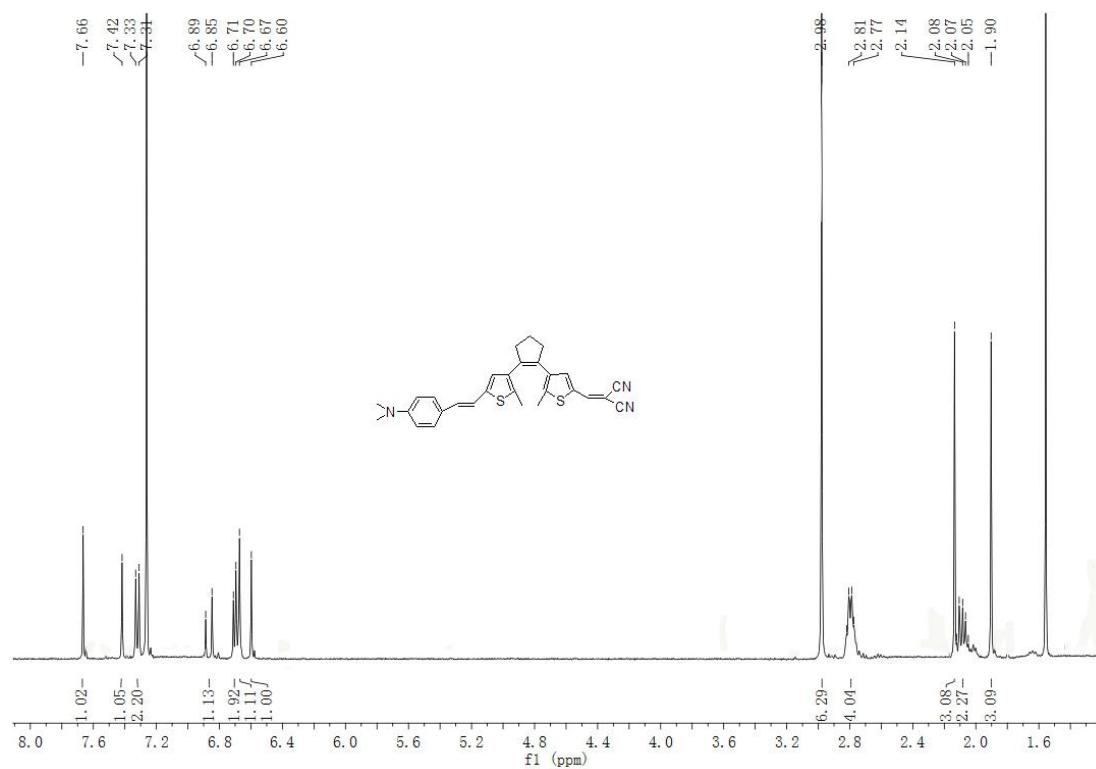

**Fig. S35** <sup>1</sup>H NMR (CDCl<sub>3</sub>, 400 MHz) spectrum of **1b**.

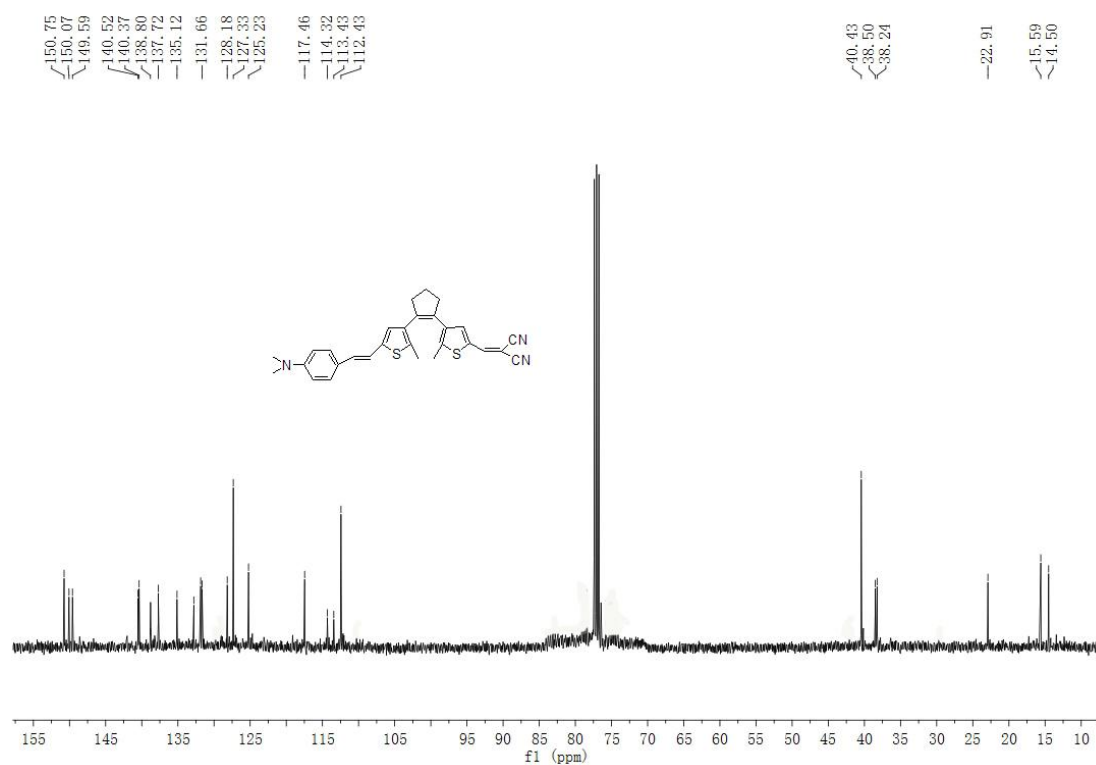

**Fig. S36** <sup>13</sup>C NMR (CDCl<sub>3</sub>, 100 MHz) spectrum of **1b**.

## Elemental Composition Report

Page 1

### Single Mass Analysis

Tolerance = 50.0 mDa / DBE: min = -1.5, max = 100.0

Element prediction: Off

Number of isotope peaks used for i-FIT = 2

Monoisotopic Mass, Even Electron Ions

152 formula(e) evaluated with 15 results within limits (up to 1 closest results for each mass)

Elements Used:

C: 0-40 H: 0-60 N: 0-5 S: 0-4

H-TIAN

ECUST institute of Fine Chem

19-Apr-2012  
18:20:27  
1: TOF MS ES+  
3.31e+003

TH-JY-11 94 (2.979) Cm (93:94)

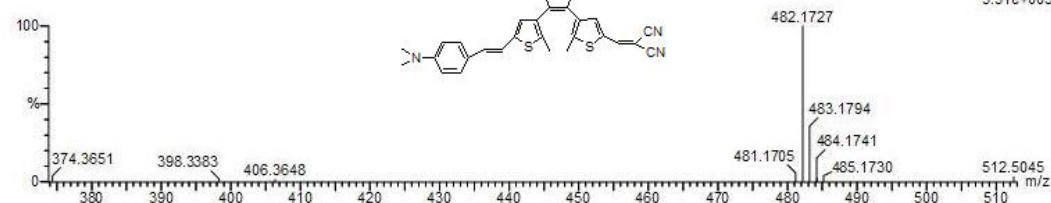

Minimum:

Maximum:

50.0 50.0 -1.5 100.0

| Mass     | Calc. Mass | mDa | PPM | DBE  | i-FIT | i-FIT (Norm) | Formula       |
|----------|------------|-----|-----|------|-------|--------------|---------------|
| 482.1727 | 482.1725   | 0.2 | 0.4 | 17.5 | 10.5  | 0.0          | C29 H28 N3 S2 |

**Fig. S37** HRMS (ESI) spectrum of compound **1b**.

## References

1. Q. Zou, J. Y. Jin, B. Xu, L. Ding and H. Tian, *Tetrahedron*, 2011, **67**, 915-921.
2. J. Heo, J. -W. O, H. -I. Ahn, S. -B. Lee, S. -E. Cho, M. -R. Kim, J. -K. Lee and N. Kim, *Synthetic Metals*, 2010, **160**, 2143-2150.
